# Supplementary material for: Transparent arrays of bilayer-nanomesh microelectrodes for simultaneous electrophysiology and two-photon imaging in the brain
Source: PubMed Central journal article supplement — Sci Adv. 2018 Sep 5;4(9):eaat0626. doi: 10.1126/sciadv.aat0626 (PMC6124910; doi:10.1126/sciadv.aat0626), 2018-09-05
Supplement: aat0626_SM.pdf [file aat0626_SM.pdf]

## Supplementary Materials for

### Transparent arrays of bilayer-nanomesh microelectrodes for simultaneous electrophysiology and two-photon imaging in the brain

Yi Qiang, Pietro Artoni, Kyung Jin Seo, Stanislav Culaclii, Victoria Hogan, Xuanyi Zhao, Yiding Zhong, Xun Han, Po-Min Wang, Yi-Kai Lo, Yueming Li, Henil A. Patel, Yifu Huang, Abhijeet Sambangi, Jung Soo V. Chu, Wentai Liu, Michela Fagiolini\*, Hui Fang\*

\*Corresponding author. Email: h.fang@northeastern.edu (H.F.); michela.fagiolini@childrens.harvard.edu (M.F.)

Published 5 September 2018, *Sci. Adv.* 4, eaat0626 (2018)

DOI: 10.1126/sciadv.aat0626

#### The PDF file includes:

- Fig. S1. Bilayer-nanomesh structure and transmittance study.
  - Fig. S2. Bilayer-nanomesh microelectrode demonstration.
  - Fig. S3. Impedance results from different bilayer-nanomesh MEAs.
  - Fig. S4. Bench-top sine wave signal recording.
  - Fig. S5. Light-induced artifact characterization.
  - Fig. S6. Demonstration of artifact-free, ITO/PEDOT:PSS bilayer-nanomesh microelectrodes.
  - Fig. S7. Artifact rejection and wireless recording system.
  - Fig. S8. Artifact rejection using Au nanomesh microelectrode.
  - Fig. S9. Histology studies.
  - Fig. S10. In vivo transparency of MEA.
  - Fig. S11. Optical imaging underneath microelectrode.
  - Fig. S12. In vivo impedance measurement after implantation.
  - Fig. S13. Optimization of nanosphere lithography.
- Legends for movies S1 to S5

#### Other Supplementary Material for this manuscript includes the following:

(available at [advances.sciencemag.org/cgi/content/full/4/9/eaat0626/DC1](https://advances.sciencemag.org/cgi/content/full/4/9/eaat0626/DC1))

Movie S1 (.mp4 format). Wide-field epifluorescence of the  $\text{Ca}^{++}$  indicator GCaMP6s showing the activity in the superficial layers of the mouse visual cortex and the surrounding areas (30× faster than the real time).

Movie S2 (.mp4 format). Video-rate two-photon  $\text{Ca}^{++}$  imaging from the neurons of the layer 2/3 of the mouse visual cortex expressing the  $\text{Ca}^{++}$  indicator GCaMP6s (30× faster than the real time).

Movie S3 (.avi format). Correlation between the  $\Delta F/F$  of  $\text{Ca}^{++}$  wide-field epifluorescence and the MEA recording (30 $\times$  faster).

Movie S4 (.mp4 format). The correlated response of arousal (left), the map of the modulation of the power of the MEA recording in different electrophysiology frequency bands (center), and the  $\Delta F/F$  of the two-photon  $\text{Ca}^{++}$  imaging (right) (3 $\times$  faster than the real time).

Movie S5 (.mp4 format). Map of the modulation of the power of the MEA recording in the multi-unit band (300 Hz to 7 kHz) during the alternation of visual stimuli and isoluminous gray screen presentations (3 $\times$  faster than the recording) in which evoked cortical activity (higher, color-coded in red) alternates with spontaneous cortical activity (lower, color-coded in green) based on the stimulus/nonstimulus presentation.

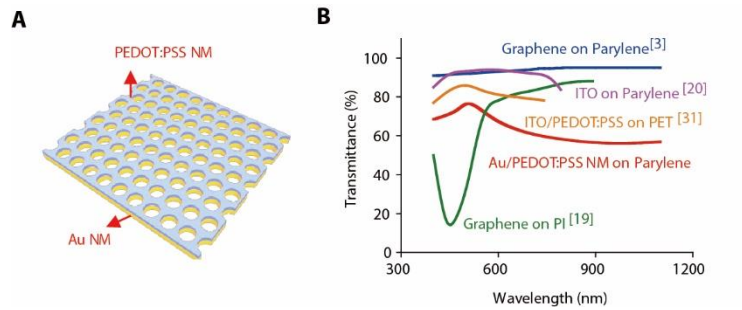

**Fig. S1. Bilayer-nanomesh structure and transmittance study.** (A) A model illustrating the bilayer nanomesh structure. The thickness is 25 nm for Au and 85 nm for PEDOT:PSS. (B) Transmittance spectra of Au/PEDOT:PSS nanomesh and other transparent ones in literature.

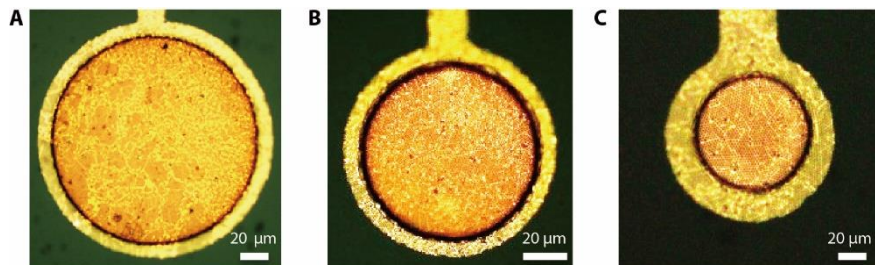

**Fig. S2. Bilayer-nanomesh microelectrode demonstration.** Microscope images of Au/PEDOT:PSS nanomesh microelectrodes with (A) 140 μm, (B) 80 μm, (C) 40 μm.

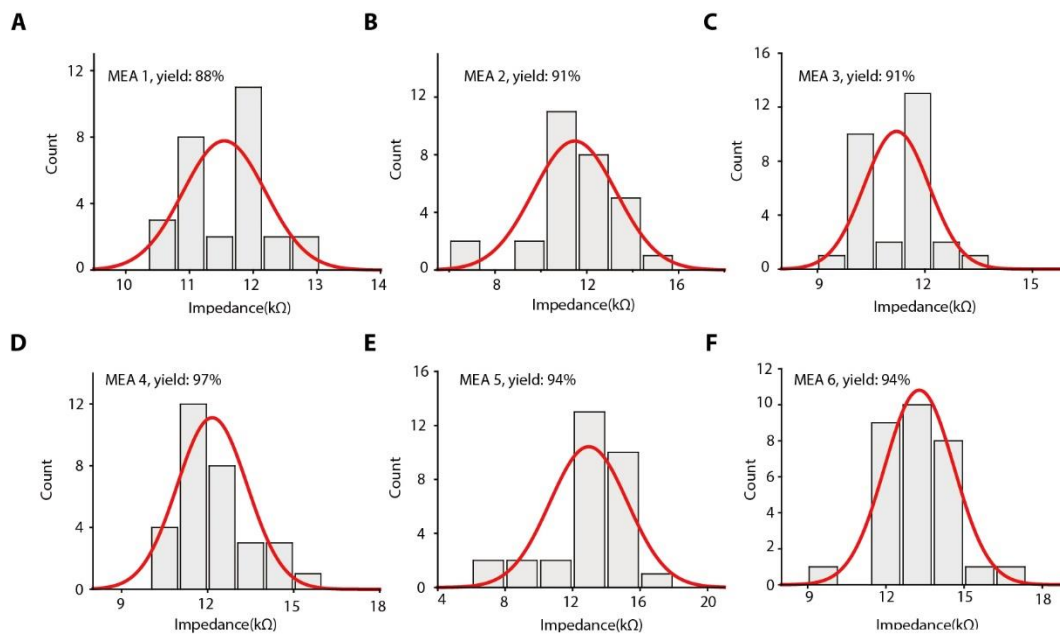

**Fig. S3. Impedance results from different bilayer-nanomesh MEAs.** Impedance histogram of Au/PEDOT:PSS nanomesh microelectrode arrays: **(A)** MEA #1, **(B)** MEA #2, **(C)** MEA #3, **(D)** MEA #4, **(E)** MEA #5 **(F)** MEA #6.

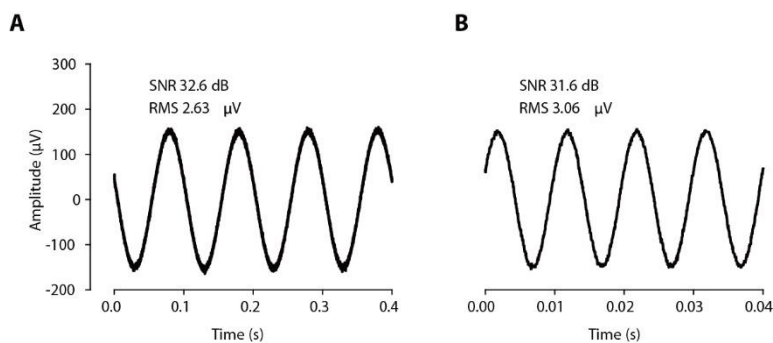

**Fig. S4. Bench-top sine wave signal recording.** Recording using Au/PEDOT:PSS nanomesh MEA with sinewave signals of 316  $\mu\text{V}_{\text{p-p}}$  at **(A)** 10 Hz, **(B)** 100 Hz

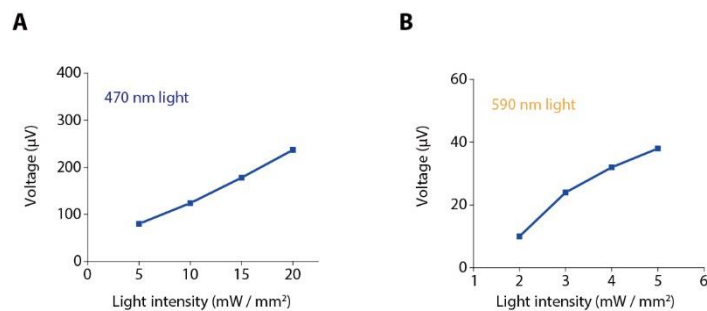

**Fig. S5. Light-induced artifact characterization.** Artifacts from Au/PEDOT:PSS nanomesh MEA using (A) 470 nm blue light (B) 590 nm amber light.

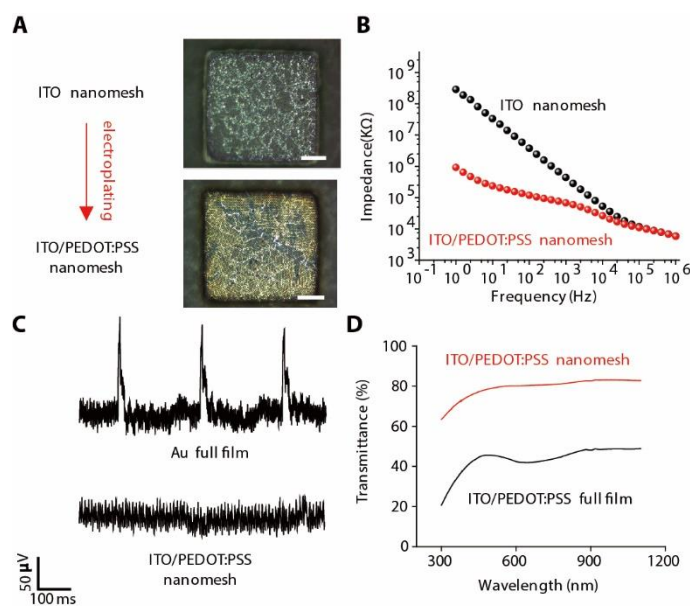

**Fig. S6. Demonstration of artifact-free, ITO/PEDOT:PSS bilayer-nanomesh microelectrodes.** (A) *Top*: ITO nanomesh microelectrode; *Bottom*: ITO/PEDOT:PSS nanomesh microelectrode (scale bar: 20 µm). (B) Impedance magnitude of ITO nanomesh and ITO/PEDOT:PSS nanomesh microelectrodes. (C) Noise recording with 470 nm, 5 Hz (5 ms duration) blue light shining on microelectrodes with an intensity of 20 mW/mm<sup>2</sup>: *Top*: Au full film microelectrode; *Bottom*: ITO/PEDOT:PSS nanomesh microelectrode. (D) Transmittance spectra of *Left*: ITO/PEDOT:PSS; *Right*: ITO/PEDOT:PSS nanomesh microelectrodes.

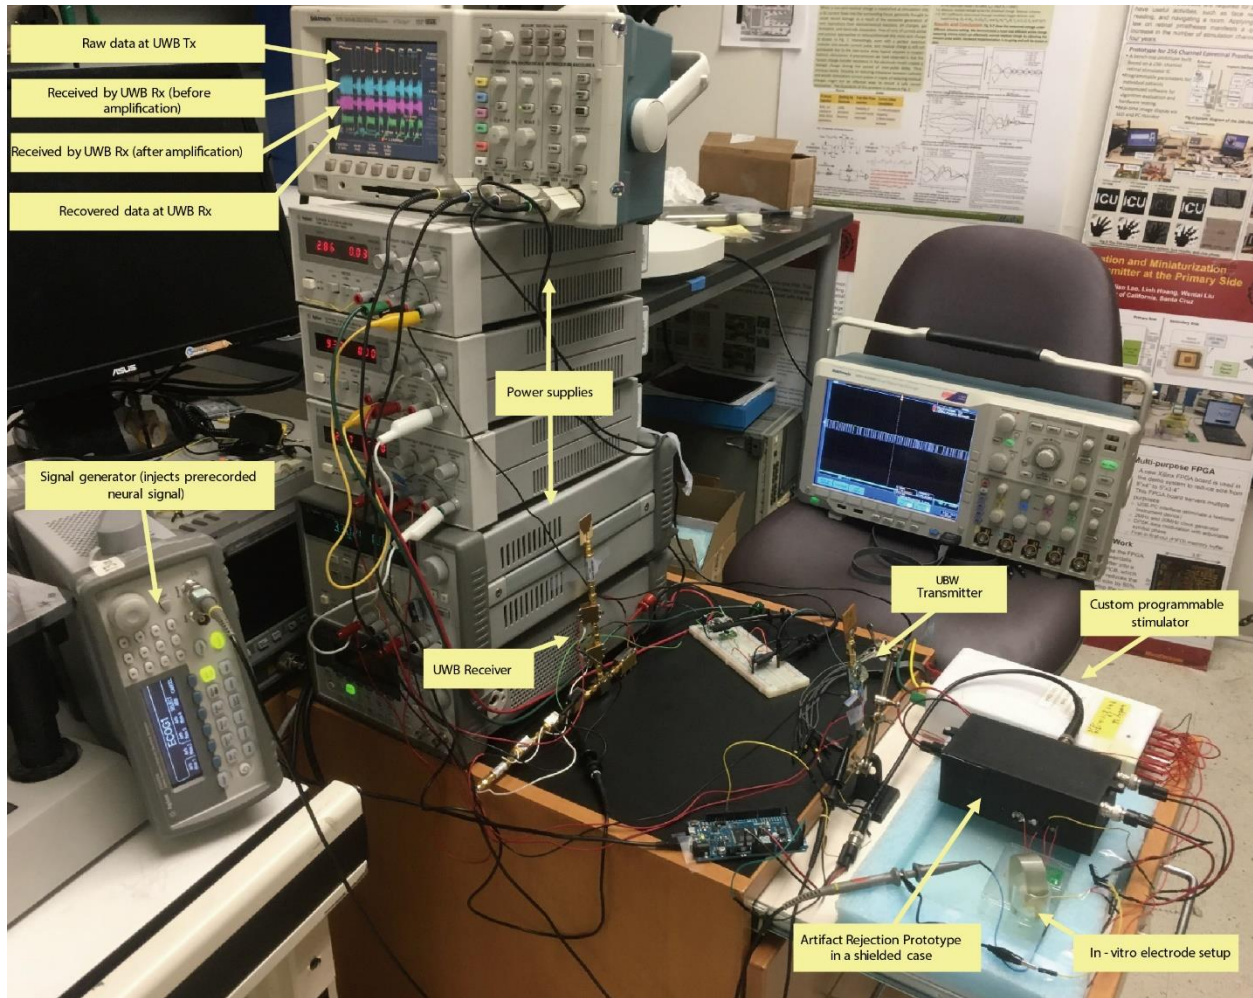

**Fig. S7. Artifact rejection and wireless recording system.** Physical test setup for demonstration of concurrent neural recording and stimulation with the 32-channel Au/PEDOT:PSS nanomesh MEA using an amplifier front-end with online stimulation artifact rejection and a back-end UWB wireless transmitter. Photo credit to Biomimetic Research Lab, UCLA.

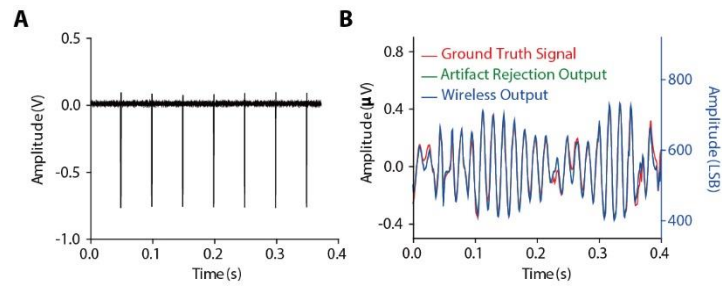

**Fig. S8. Artifact rejection using Au nanomesh microelectrode.** Artifacts rejection using pure Au nanomesh microelectrode: (A) Input neural signal contaminated with large stimulation artifacts (Stimulation current:  $0.05 \text{ mC/cm}^2$ ). (B) Ground truth neural signal overlapped with artifact rejection output (*Left y-axis*) and wireless output (*Right y-axis*) for comparison.

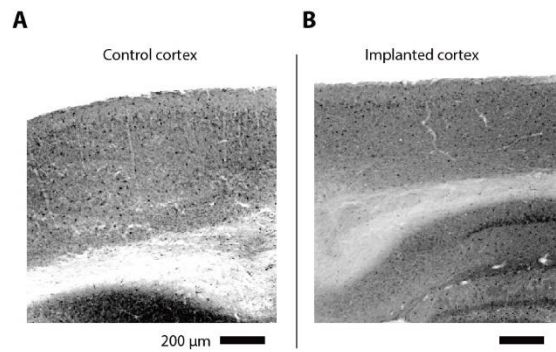

**Fig. S9. Histology studies.** IBA1 staining for evaluating possible microglia activation on the control cortex (A, control) and on the cortex implanted with both cranial window and transparent MEA (B, electrode only).

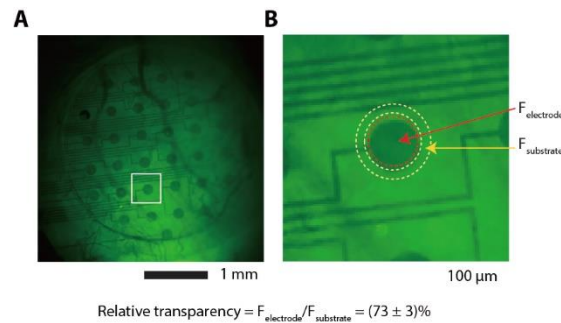

**Fig. S10. In vivo transparency of MEA.** *In vivo* optical measurement showing relative transparency between Au/PEDOT:PSS nanomesh microelectrode site and Parylene C substrate (A, zoomed out, B, zoomed in.)

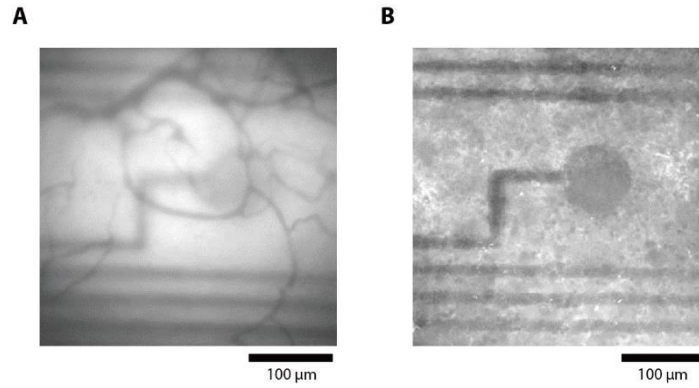

**Fig. S11. Optical imaging underneath microelectrode.** Average epifluorescence  $\text{Ca}^{++}$  imaging (A) and 2-photon  $\text{Ca}^{++}$  imaging (B) on dendrites in layer I (depth  $< 50 \mu\text{m}$ ). The size of the electrode pad (diameter =  $80 \mu\text{m}$ ) is less than the imaged depth in layer I. The  $\text{Ca}^{++}$  sensor GCaMP6s has been imaged with conventional FITC filters for epifluorescence (1-photon excitation) and with 930 nm pulsed excitation, 500-550 nm emission filter for 2-photon imaging (2-photon excitation).

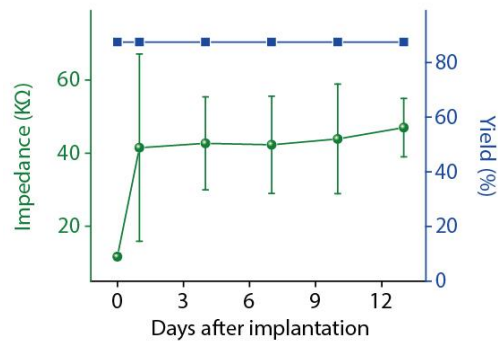

**Fig. S12. In vivo impedance measurement after implantation.** *In vivo* impedance measurement with days after implantation: *Left*: Impedance value at 1 KHz; *Right*: MEA Yield with days after implantation.



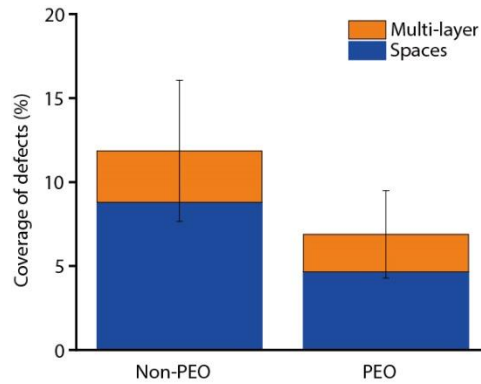

**Fig. S13. Optimization of nanosphere lithography.** Coverage percentage of nanosphere defects (multiplayer or empty space) with and without PEO added to PS nanosphere solution.

### Supplementary Movies

**Movie S1. Wide-field epifluorescence of the  $\text{Ca}^{++}$  indicator GCaMP6s showing the activity in the superficial layers of the mouse visual cortex and the surrounding areas (30× faster than the real time).**

**Movie S2. Video-rate two-photon  $\text{Ca}^{++}$  imaging from the neurons of the layer 2/3 of the mouse visual cortex expressing the  $\text{Ca}^{++}$  indicator GCaMP6s (30× faster than the real time).**

**Movie S3. Correlation between the  $\Delta F/F$  of  $\text{Ca}^{++}$  wide-field epifluorescence and the MEA recording (30× faster). The white square indicates the position of the MEA.**

**Movie S4. The correlated response of arousal (left), the map of the modulation of the power of the MEA recording in different electrophysiology frequency bands (center), and the  $\Delta F/F$  of the two-photon  $\text{Ca}^{++}$  imaging (right) (3× faster than the real time). The white squares indicate the area imaged by the 2-photon microscope.**

**Movie S5. Map of the modulation of the power of the MEA recording in the multi-unit band (300 Hz to 7 kHz) during the alternation of visual stimuli and isoluminous gray screen presentations (3× faster than the recording) in which evoked cortical activity (higher, color-coded in red) alternates with spontaneous cortical activity (lower, color-coded in green) based on the stimulus/nonstimulus presentation.**
